# Supplementary material for: CmVPS41 Is a General Gatekeeper for Resistance to Cucumber Mosaic Virus Phloem Entry in Melon
Source: Front Plant Sci. 2019 Oct 1;10:1219. doi: 10.3389/fpls.2019.01219 (PMC6781857; doi:10.3389/fpls.2019.01219)
Supplement: Supplementary file 3 [file Table_1.xlsx]

## Sheet: Supplementary table 1
Suplementary table 1. Accessions analyzed. Information includes code used along the manuscript, comon name, melon type, asigned group according to previous structure analysis, country of orgin, CmVPS41 gene haplotype, CmVPS41 protein alelle, response to the inoculation with CMV-LS S(susceptible) and R(Resistant)
Code	Comon name	Type	Structure group *	Origin	Haplotype gene (16)	Protein type (12)	Phenotype CMV-LS
Am-Bol (CO5)	Bol-84 (BGV-7691)	ameri	A	Bolivia	Hap-1	Prot-1	Na
Can-VedFran (CO201)	Vedrantais	cantalupensis	1	France	Hap-1	Prot-1	S
Con-YaPuJa (CO207)	Yamato Purinsu	conomon (makuwa)-cantalupensis	1.6	Japan	Hap-1	Prot-1	Na
In-PsSp (PS)	Piel de sapo	inodorus (ibericus)	3	Spain	Hap-1	Prot-1	S
Con-LongtChi	Long Tian (Ames 22810)	conomon (makuwa)	Na	China	Hap-2	Prot-2	Na
Con-KNMJa	Kogane Nashi Makuwa (CUM 183)	conomon (makuwa)	Na	Japan	Hap-2	Prot-2	Na
Mom-KhaInd (CO19)	Kharbuja (CUM 438)	momordica	5	India	Hap-2	Prot-2	Na
Dud-DudaimFra	CUM 58	dudaim	5	Iran	Hap-2	Prot-2	Na
Con-CUM206Chi	CUM206	conomon (chinensis)	Na	China	Hap-2	Prot-2	Na
Mom-PI124Ind	Calcuta (PI 124112)	momordica	Na	India	Hap-2	Prot-2	S
Chi-VellInd (CO22)	Velleri (PI 164320)	chito	7.6	India	Hap-2	Prot-2	S
Dud-QAPMSwitz (CO175)	Queen Annes Pocket Melon (PI 273 438)	dudaim	6.2	Afghanistan	Hap-2	Prot-2	S
Mom-PI414Ind (CO176)	LJ 90234 (PI 414723)	momordica	A	India	Hap-2	Prot-2	Na
Con-GouChi (CO105)	Gou Gua (PI 532829)	conomon (makuwa)	6.5	China	Hap-2	Prot-2	Na
Con-Baish1Chin	Baishami (PI 618852)	conomon (makuwa)	Na	China	Hap-2	Prot-2	Na
Con-Baish2Chin	Baishami (PI 618853)	conomon (makuwa)	Na	China	Hap-2	Prot-2	Na
Con-LongtChi (CO7)	Long Tian (PI 618854)	conomon (makuwa)	6	China	Hap-2	Prot-2	Na
Con_Xiao1Chin	Xiaobai (PI 618857)	conomon (makuwa)	Na	China	Hap-2	Prot-2	Na
Con-HerChin	Hermaphrodite B (PI 420150)	conomon (makuwa)	Na	China	Hap-2	Prot-2	Na
Am-KizilUzbe (CO96)	Kizil Uruk	ameri	5	Uzbekistan	Hap-2	Prot-2	S
Con-BaishChin (CO117)	Baishami	conomon (makuwa)	6	China	Hap-2	Prot-2	Na
Con-Co6Chi (CO6)	Makuwa	conomon (chinensis)	6	China	Hap-2	Prot-2	S
Con-GapPhi (CO138)	Gapan	conomon (chinensis)	6.3	Philippines	Hap-2	Prot-2	Na
Con-PauPol (CO169)	Paul	conomon (makuwa)	6	Poland	Hap-2	Prot-2	Na
Con-XiaoChi (CO206)	Xiaobai	conomon (makuwa)	6	China	Hap-2	Prot-2	Na
Dud-DudaimAfg (CO1)	CUM 254	dudaim	6,7,2	Afghanistan	Hap-2	Prot-2	S
Mom-MR1Ind (CO155)	MR1	momordica	A	India	Hap-2	Prot-2	Na
Ag-WCHInd (CO2014)	Wild Chibbar	wild indian agrestis	7.6	India	Hap-2	Prot-2	S
Am-ChanRus (CO124)	Chandaljak	ameri (chandalak)	5.4	Russia	Hap-2	Prot-2	Na
Con-OmGMJa	CUM188	conomon (makuwa)	Na	Japan	Hap-2	Prot-2	S
Dud-C1012Irak	Irak (C1012)	dudaim	Na	Iraq	Hap-2-C1012Irak	Prot-2-C1012Irak	S
Tibish-Ksud (CO199)	Tibish Khurtagat	tibish	7	Sudan	Hap-2-Ksud	Prot-2	Na
Dud-QPMAfg (CO180)	Queen's pocket melon	dudaim	6,7,2	Afghanistan	Hap-2-QPMAfg	Prot-2	R
Con-SCKo (SC)	Shogwan Charmi (PI 161375)	conomon (chinensis)	6	Korea	Hap-3	Prot-3	R
Con-GMJa (CO30)	Ginsen makuwa (PI 420176)	conomon (makuwa)	6	Japan	Hap-3	Prot-3	R
Con-Chi51Chi (CO125)	China 51	conomon (makuwa)-cantalupensis	1.6	China	Hap-3	Prot-3	R
Con-MielChi (CO154)	Miel Blanc	conomon (chinensis)	6.5	China	Hap-3	Prot-3	R
Con-FreeCJa (CO136)	Freeman's Cucumber	conomon	6	Japan	Hap-4	Prot-4	R
Con-NanChi (CO158)	Nanbukin	conomon (makuwa)	6	North china	Hap-4	Prot-4	R
Con-OgonChi (CO164)	Ogon 9	conomon (makuwa)	6	South china	Hap-4	Prot-4	R
Con-ShiroJa (CO185)	Shiro Uri Okayama	conomon	6	Japan	Hap-4	Prot-4	R
Con-Pat81Ko (CO32)	Pat81	conomon (chinensis)	6	Korea	Hap-4-Pat81Ko	Prot-4-Pat81Ko	R
Flex-AryaInd (CO115)	Arya	Flexuosus	A	India	Hap-5	Prot-5	S
Ag-TriInd	Trigonus (Ames 24297)	wild indian agrestis	Na	Pakistan	Hap-5	Prot-5	S
Ag-KakInd	Kakru (PI 164493)	wild indian agrestis	Na	India	Hap-5-Kakru	Prot-5	S
Ac-TGR1551Zimb (CO100)	TGR 1551 (PI 482420)	acidulus	7.6	Zimbabwe	Hap-5-TGR1551Zimb	Prot-5 TGR1551Zimb	S
Ag-15591Gha (CO14)	15591 (PI 185111)	wild african agrestis	7	Ghana	Hap-6	Prot-2	Na
Ag-TayCam (CO 195)	Tayer	wild african agrestis	7	Cameroon	Hap-6	Prot-2	Na
Ag-C38Nig (CO38)	CUM 287	wild african agrestis	7	Nigeria	Hap-6-C38Nig	Prot-6-C38Nig	S
Ag-C836CV	Cabo Verde (C836)	wild african agrestis	Na	Cape Verde	Hap-6-C836CV	Prot-6-C836CV	S
Chate-CarBIta (CO122)	Carosello Baresse	chate	1,4,5	Italy	Hap-7-CarBItA	Prot-7-CarBIta	S
Con-SanIlPhil (CO182)	San Ildefonso	conomon (chinensis)	6.7	Philippines	Hap-7-SanIlPhil	Prot-7-SanIlPhil	S
*Structure groups according to Leida et al. (2015): 1 and 2: Cantalupensis accessions, French charentais and reticulatus, respectivelly, 3: Spanish inodorus, 4: Worldwide inodorus and ameri, 5: Asian ameri, 6: Oriental melons, conomon, chinensis and makuwa, 7: African agrestis, A: Admixture, accessions that could not be associated to any of the groups
